# Supplementary material for: Efficient hydrogen storage on Al decorated C24N24: a DFT study
Source: Royal Society of Chemistry journal article supplement (doi:10.1039/d1nj04096k), 2021-01-01

## “Supplementary Materials”

# Efficient hydrogen storage on Al decorated C<sub>24</sub>N<sub>24</sub>: A DFT study

Mehdi D. Esrafil<sup>\*</sup> and Parisasadat Mousavian

Department of Chemistry, Faculty of Basic Sciences, University of Maragheh, P.O. Box 55136-553, Maragheh, Iran

<sup>\*</sup>Corresponding author. **Phone:** (+98) 4212237955. **Fax:** (+98) 4212276060. **P.O. Box:** 5513864596. **E-mail:** esrafil<sup>i</sup>@maragheh.ac.ir

**Figure S1.** The geometries of  $\text{AlC}_{24}\text{N}_{24}$  after the AIMD simulations at 600 and 1000 K (2000 fs)

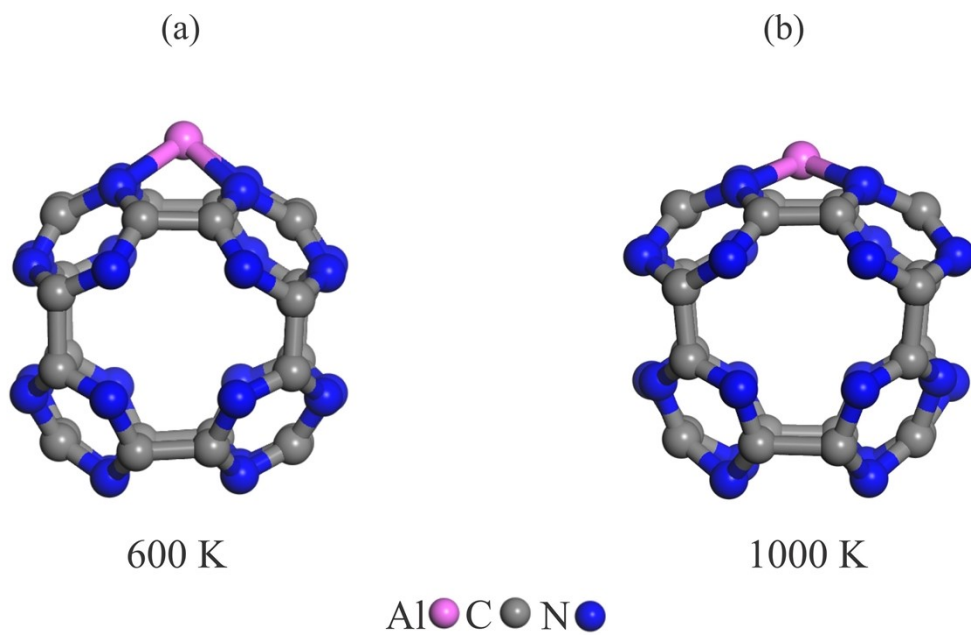

**Figure S2.** The geometries of  $\text{Al}_6\text{C}_{24}\text{N}_{24}$  after the AIMD simulations at 600 and 1000 K (2000 fs)

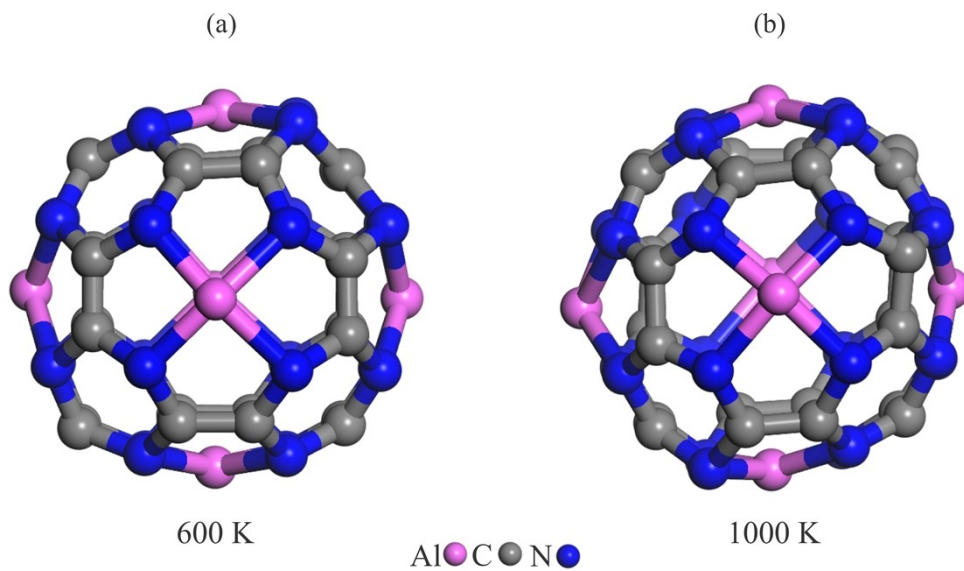

**Figure S3.** Molecular graphs of  $\text{AlC}_{24}\text{N}_{24}:\text{H}_2$  (configuration **A**) (a),  $\text{AlC}_{24}\text{N}_{24}:\text{H}_2$  (configuration **B**) (b),  $\text{AlC}_{24}\text{N}_{24}:(\text{H}_2)_2$  (c),  $\text{AlC}_{24}\text{N}_{24}:(\text{H}_2)_3$  (d),  $\text{AlC}_{24}\text{N}_{24}:(\text{H}_2)_2$  (e) and  $\text{AlC}_{24}\text{N}_{24}:(\text{H}_2)_2$  (f). The small red circles indicate the BCPs.

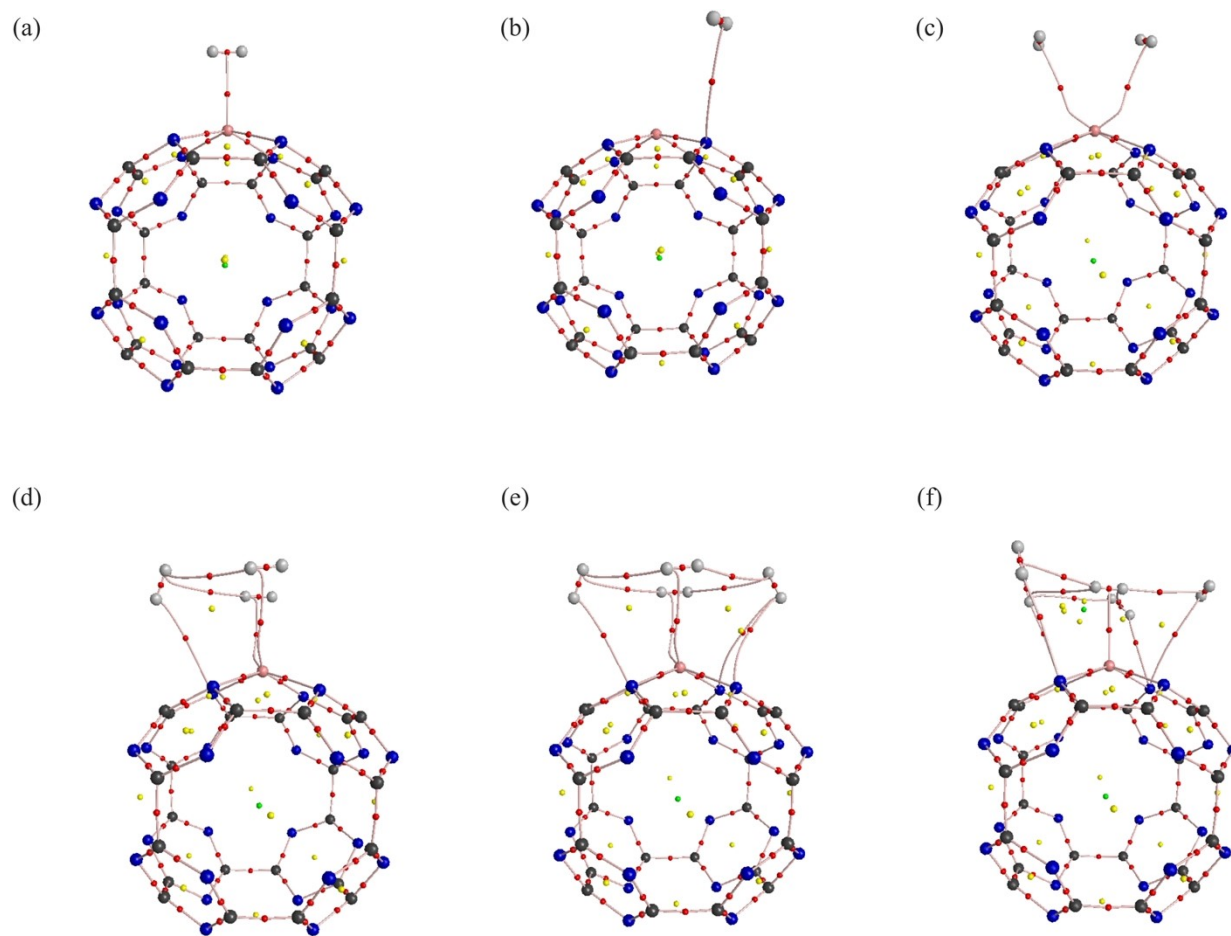

Supplement: d1nj04096k1.pdf [file d1nj04096k1.pdf]
